# Supplementary material for: Selective hydrodeoxygenation of lignin-derived phenols to alkyl cyclohexanols over a Ru-solid base bifunctional catalyst
Source: Royal Society of Chemistry journal article supplement (doi:10.1039/c6gc01097k), 2016-01-01
Supplement: c6gc01097k1.pdf [file c6gc01097k1.pdf]

## Supporting information

### **Selective Hydrodeoxygenation of Lignin-Derived Phenols to Alkyl Cyclohexanols over Bifunctional Catalyst**

**Guang-Yue Xu, † Jian-Hua Guo, † Yan-Chao Qu, Ying Zhang\*, Yao Fu and Qing-xiang Guo**

Anhui Province Key Laboratory of Biomass Clean Energy, University of Science and Technology of China, Hefei 230026, P. R. China, Fax: 86-551-6360-6689; Tel: 86-551-6360-3463; E-mail: [zhzhying@ustc.edu.cn](mailto:zhzhying@ustc.edu.cn)

† These authors contributed equally to this work.

**Table S1.** pH values of the catalyst-water mixture.

| Catalyst | pH    |
|----------|-------|
| RuZr     | 6.37  |
| RuMg     | 10.75 |
| RuLa     | 7.87  |
| RuZrLa-4 | 9.29  |
| RuZrLa-2 | 9.30  |
| RuZrLa-1 | 9.40  |

**Table S2.** The metal losses in the liquid residue.

| Catalyst | Ru/%  | Zr/%  | La/%  |
|----------|-------|-------|-------|
| RuZr     | 0.052 | 0.011 | 0     |
| RuZrLa-4 | 0.049 | 0.007 | 0.125 |
| RuZrLa-2 | 0.041 | 0.017 | 0.032 |
| RuZrLa-1 | 0.047 | 0.018 | 0.061 |
| RuLa     | 0.042 | 0     | 0.903 |

**Table S3.** Hydrogen desorption of catalysts.

| Catalyst | H <sub>2</sub> desorption/mmol(H <sub>2</sub> )*g(catalyst) <sup>-1</sup> |
|----------|---------------------------------------------------------------------------|
| RuZr     | 0.355                                                                     |
| RuZrLa-4 | 0.554                                                                     |
| RuZrLa-2 | 0.610                                                                     |
| RuZrLa-1 | 0.579                                                                     |
| RuLa     | 0.517                                                                     |

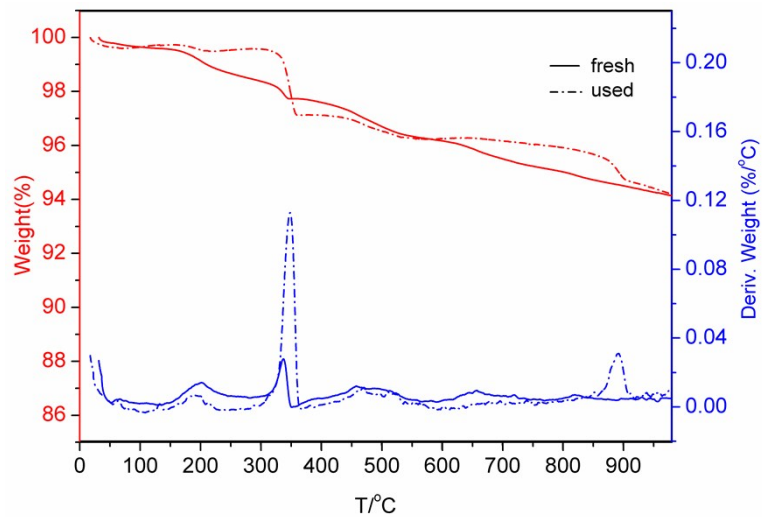

**Figure S1.** TGA curves of fresh and used RuZrLa-2 catalyst.

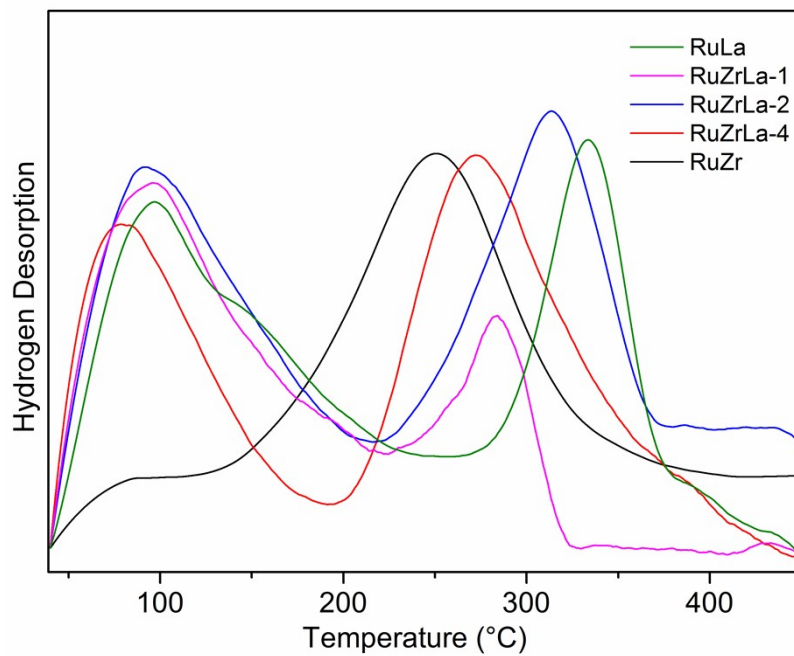

**Figure S1.** The H<sub>2</sub>-TPD profiles of the catalysts.
